# Supplementary material
Source: PubMed Central journal article supplement (PMC2950815)

Web **Figure 1**: Forest plot of the association of birth order with risk of NHL (reference category = first born) in 14 NHL case-control studies within InterLymph.

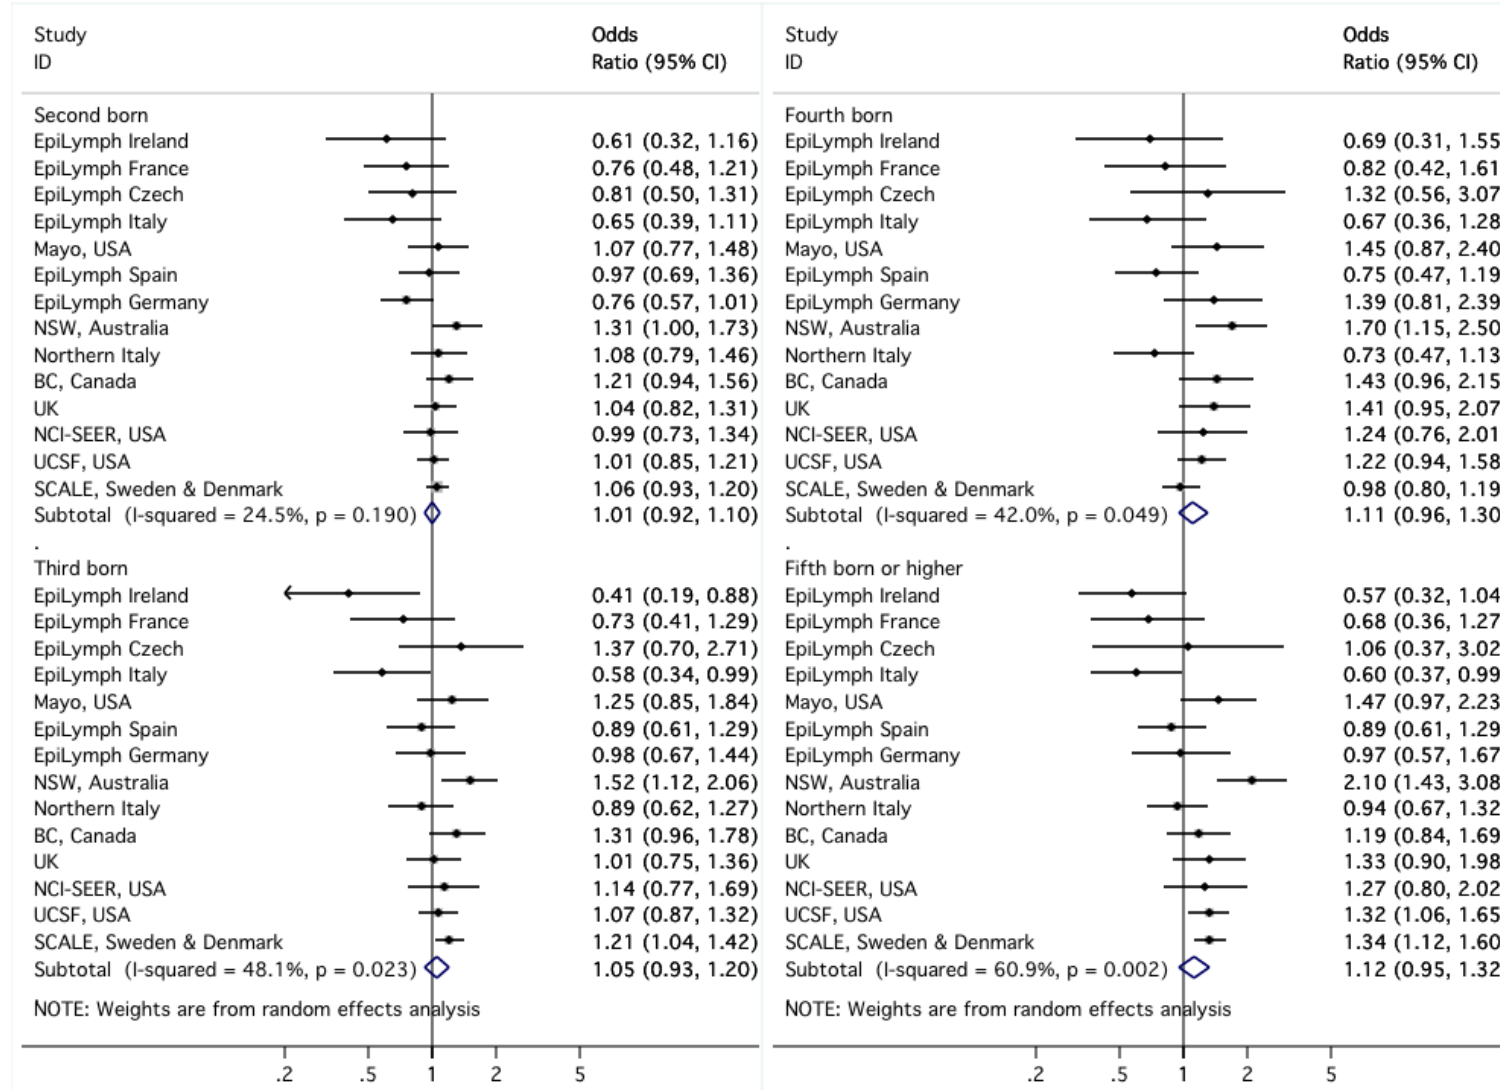

Supplement: supp_kwq167_Web_Figure_1.pdf [file supp_kwq167_Web_Figure_1.pdf]
